# Supplementary material for: Prevalence of Gestational Diabetes Mellitus in the Middle East and North Africa, 2000–2019: A Systematic Review, Meta-Analysis, and Meta-Regression
Source: PubMed Central journal article supplement (PMC8427302; doi:10.3389/fendo.2021.668447), 2021-08-26
Supplement: Image_1.pdf [file Image_1.pdf]

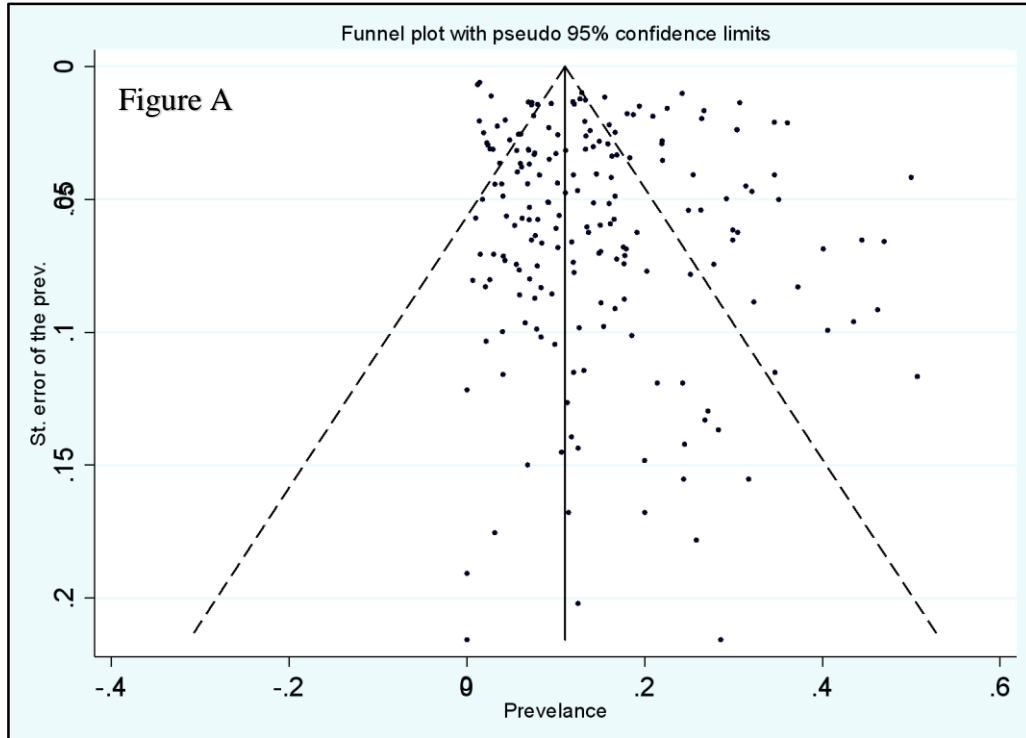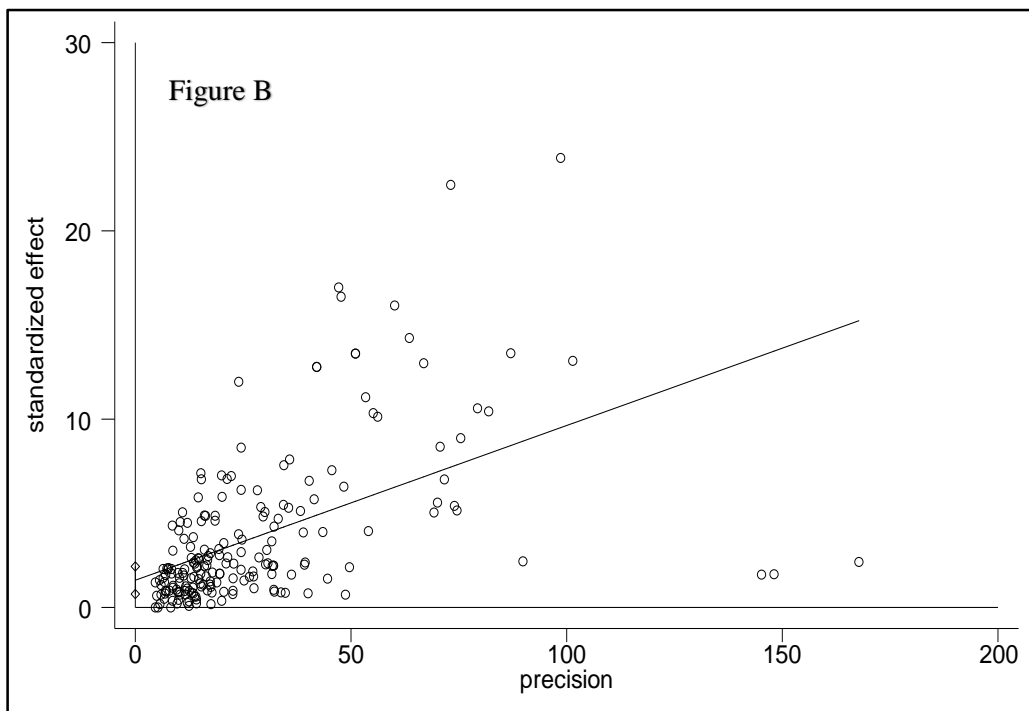

**Supplementary Figure 1.** Funnel plots (A) and Egger's publication bias plot (B) examining small-study effects on the pooled GDM prevalence among pregnant women in the MENA region, 2000–2019; Egger's test  $p < 0.0001$ . Slope coefficient 0.082 (95% CI 0.06–0.10;  $p < 0.001$ ).

GDM, gestational diabetes mellitus.
